# Supplementary material for: Potential theranostics of breast cancer with copper-64/67 sarcophagine-trastuzumab
Source: Royal Society of Chemistry journal article supplement (doi:10.1039/d4sc06969b), 2025-01-01
Supplement: d4sc06969b1.pdf [file d4sc06969b1.pdf]

## Supplementary Information

### Potential Theranostics of Breast Cancer with Copper-64/67 Sarcophagine-trastuzumab

Stacey E. Rudd,<sup>\*a</sup> Jessica Van Zuylekom,<sup>b,c</sup> Carleen Cullinane,<sup>b,c,#</sup> Benjamin Blyth<sup>b,c</sup> and Paul S. Donnelly<sup>\*a</sup>

---

<sup>a</sup> School of Chemistry and Bio21 Molecular Science and Biotechnology Institute, University of Melbourne, Melbourne, Victoria 3010, Australia

<sup>b</sup> Models of Cancer Translational Research Centre, Research Division, Peter MacCallum Cancer Centre, 305 Grattan St, Melbourne, Victoria, Australia, 3000.

<sup>c</sup> Sir Peter MacCallum Department of Oncology, The University of Melbourne, Parkville, Victoria, Australia, 3010.

# deceased

\*corresponding authors: [stacey.rudd@unimelb.edu.au](mailto:stacey.rudd@unimelb.edu.au); [pauld@unimelb.edu.au](mailto:pauld@unimelb.edu.au)

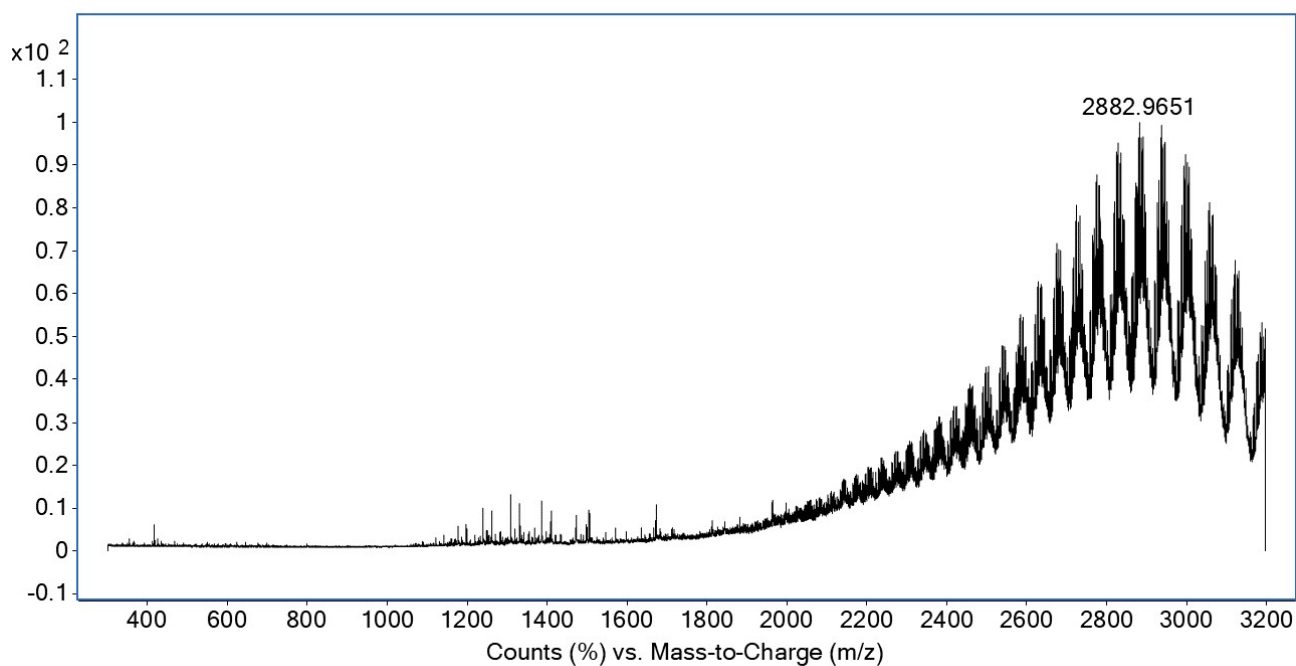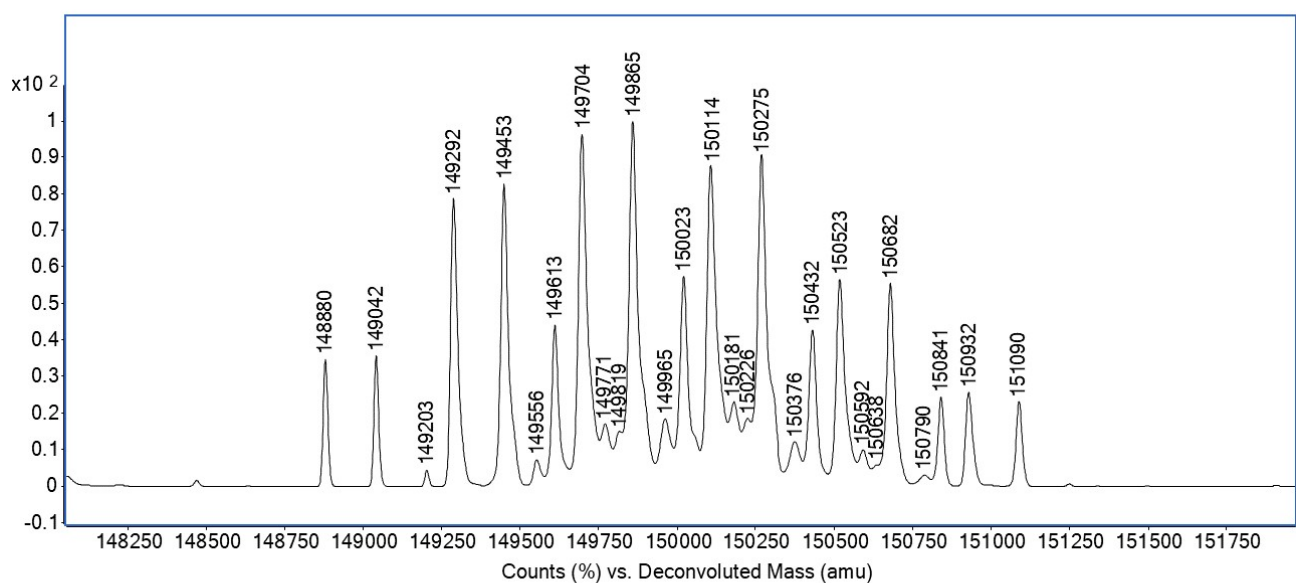

**Supplementary Figure 1.** (Top)  $m/z$  and (bottom) deconvoluted ESI mass spectra of the MeCOSar-trastuzumab conjugate.

**deconvoluted mass (amu)      abundance**

|               |          |
|---------------|----------|
| <b>148880</b> | 11883.37 |
| <b>149042</b> | 12186.11 |
| <b>149203</b> | 1522.96  |
| <b>149292</b> | 26834.63 |
| <b>149453</b> | 28214.01 |
| <b>149556</b> | 2488.38  |
| <b>149613</b> | 15046.97 |
| <b>149704</b> | 32812.84 |
| <b>149771</b> | 5845.24  |
| <b>149819</b> | 5024.63  |
| <b>149865</b> | 34129.11 |
| <b>149965</b> | 6289.76  |
| <b>150023</b> | 19647.52 |
| <b>150114</b> | 29860.18 |
| <b>150181</b> | 7903.86  |
| <b>150226</b> | 6286.45  |
| <b>150275</b> | 31029.15 |
| <b>150376</b> | 4176.64  |
| <b>150432</b> | 14613.89 |
| <b>150523</b> | 19318.11 |
| <b>150592</b> | 3407.94  |
| <b>150638</b> | 1992.58  |
| <b>150682</b> | 18981.05 |
| <b>150790</b> | 1082.31  |
| <b>150841</b> | 8337.58  |
| <b>150932</b> | 8780.71  |
| <b>151090</b> | 7929.07  |

**Supplementary Table 1.** Mass and observed abundance of each signal from the deconvoluted ESI mass spectra of the MeCOSar-trastuzumab conjugate.

| <b>Isotope</b>   | <b>Study</b>                                          | <b>Dose range (MBq)</b> | <b>Mean Dose (MBq)</b> |
|------------------|-------------------------------------------------------|-------------------------|------------------------|
| <sup>64</sup> Cu | Imaging in NSG mice (3 MBq cohort)                    | 2.75-2.95               | 2.85                   |
| <sup>64</sup> Cu | Imaging in balb/c nu/nu mice (10 MBq cohort)          | 7.95-10.95              | 10.11                  |
| <sup>67</sup> Cu | Biodistribution in balb/c nu/nu mice (4.5 MBq cohort) | 4.40-4.94               | 4.73                   |
| <sup>67</sup> Cu | Efficacy in balb/c nu/nu mice (4.5 MBq cohort)        | 4.15-4.57               | 4.36                   |
| <sup>67</sup> Cu | Efficacy in balb/c nu/nu mice (6.7 MBq cohort)        | 6.29-6.77               | 6.63                   |
| <sup>67</sup> Cu | Efficacy in balb/c nu/nu mice (9.0 MBq cohort)        | 8.60-9.26               | 9.04                   |

**Supplementary Table 2.** Range and mean doses of activity administered to mouse cohorts for each study.

### Mouse # 17

Tumour volume 118 mm<sup>3</sup>

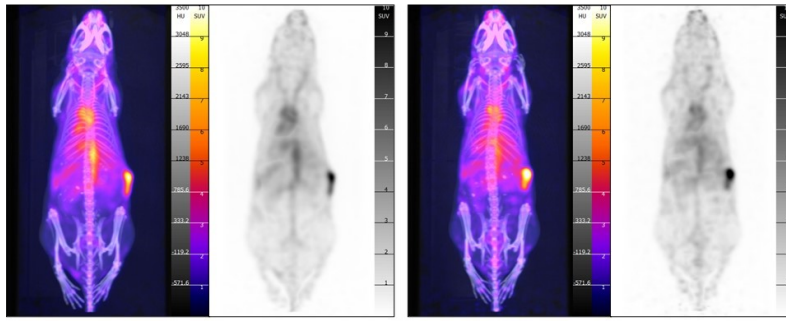

| 24 hr               |      | 48 hr               |      |
|---------------------|------|---------------------|------|
| SUV <sub>max</sub>  | 10.3 | SUV <sub>max</sub>  | 13.7 |
| Tumour:Bkg Ratio    | 11.4 | Tumour:Bkg Ratio    | 13.4 |
| Tumour:Kidney Ratio | 4.54 | Tumour:Kidney Ratio | 6.07 |
| Tumour:Liver Ratio  | 3.25 | Tumour:Liver Ratio  | 4.65 |
| Tumour:Bone Ratio   | 9.19 | Tumour:Bone Ratio   | 11.9 |

### Mouse # 33

Tumour volume 190 mm<sup>3</sup>

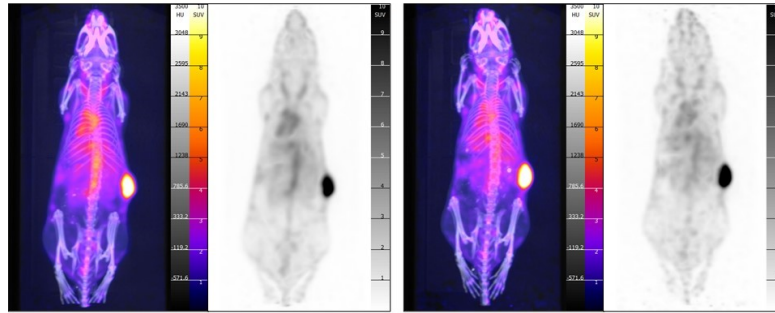

| 24 hr               |      | 48 hr               |      |
|---------------------|------|---------------------|------|
| SUV <sub>max</sub>  | 18.0 | SUV <sub>max</sub>  | 24.4 |
| Tumour:Bkg Ratio    | 21.4 | Tumour:Bkg Ratio    | 30.9 |
| Tumour:Kidney Ratio | 8.31 | Tumour:Kidney Ratio | 12.4 |
| Tumour:Liver Ratio  | 7.04 | Tumour:Liver Ratio  | 8.72 |
| Tumour:Bone Ratio   | 17.1 | Tumour:Bone Ratio   | 24.3 |

### Mouse # 35

Tumour volume 399 mm<sup>3</sup>

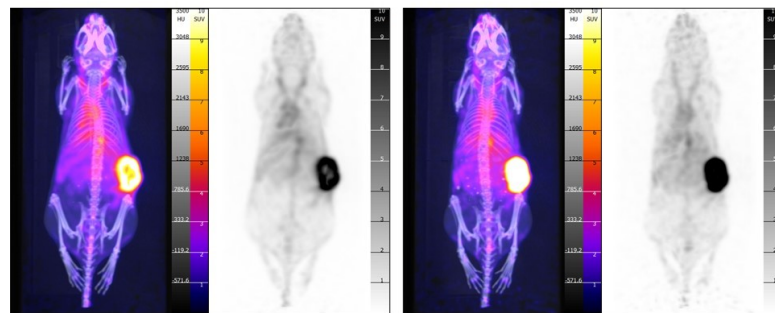

| 24 hr               |      | 48 hr               |      |
|---------------------|------|---------------------|------|
| SUV <sub>max</sub>  | 13.8 | SUV <sub>max</sub>  | 20.8 |
| Tumour:Bkg Ratio    | 18.1 | Tumour:Bkg Ratio    | 33.3 |
| Tumour:Kidney Ratio | 6.57 | Tumour:Kidney Ratio | 9.07 |
| Tumour:Liver Ratio  | 4.93 | Tumour:Liver Ratio  | 8.46 |
| Tumour:Bone Ratio   | 13.7 | Tumour:Bone Ratio   | 22.2 |

### Mouse # 61

Tumour volume 148 mm<sup>3</sup>

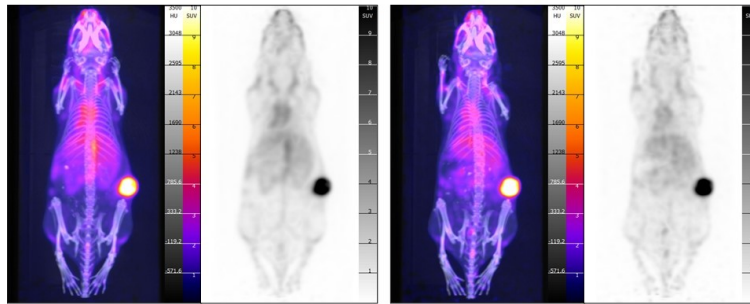

| 24 hr               |      | 48 hr               |      |
|---------------------|------|---------------------|------|
| SUV <sub>max</sub>  | 14.9 | SUV <sub>max</sub>  | 17.8 |
| Tumour:Bkg Ratio    | 18.8 | Tumour:Bkg Ratio    | 21.1 |
| Tumour:Kidney Ratio | 7.84 | Tumour:Kidney Ratio | 10.4 |
| Tumour:Liver Ratio  | 5.70 | Tumour:Liver Ratio  | 7.34 |
| Tumour:Bone Ratio   | 14.6 | Tumour:Bone Ratio   | 20.1 |

### Mouse # 63

Tumour volume 206 mm<sup>3</sup>

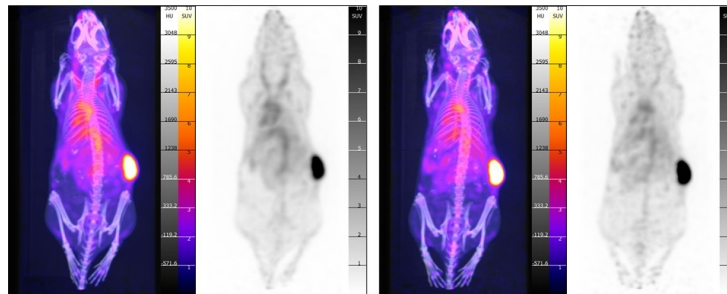

| 24 hr               |      | 48 hr               |      |
|---------------------|------|---------------------|------|
| SUV <sub>max</sub>  | 18.8 | SUV <sub>max</sub>  | 28.3 |
| Tumour:Bkg Ratio    | 19.0 | Tumour:Bkg Ratio    | 33.3 |
| Tumour:Kidney Ratio | 9.12 | Tumour:Kidney Ratio | 14.2 |
| Tumour:Liver Ratio  | 6.50 | Tumour:Liver Ratio  | 9.80 |
| Tumour:Bone Ratio   | 17.3 | Tumour:Bone Ratio   | 27.6 |

**Supplementary Figure 2.** PET/CT (MIP) images of SKOV-3 tumour-bearing Balb/c nu/nu mice administered with [<sup>64</sup>Cu]Sar-trastuzumab at 24 or 48 hours after administration and corresponding image quantitation.

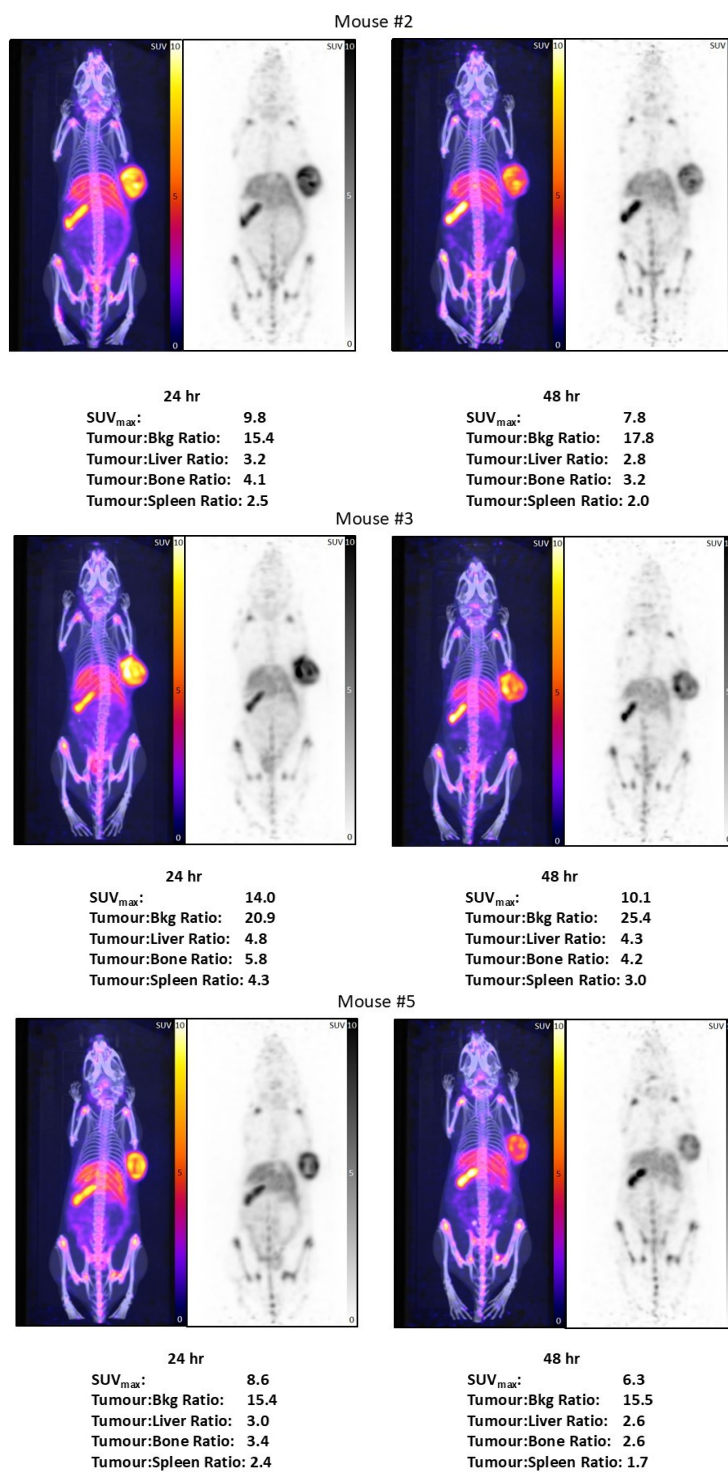

**Supplementary Figure 3.** PET/CT (MIP) images of SKOV-3 tumour-bearing NSG mice administered with [<sup>64</sup>Cu]Sar-trastuzumab at 24 or 48 hours after administration and corresponding image quantitation.

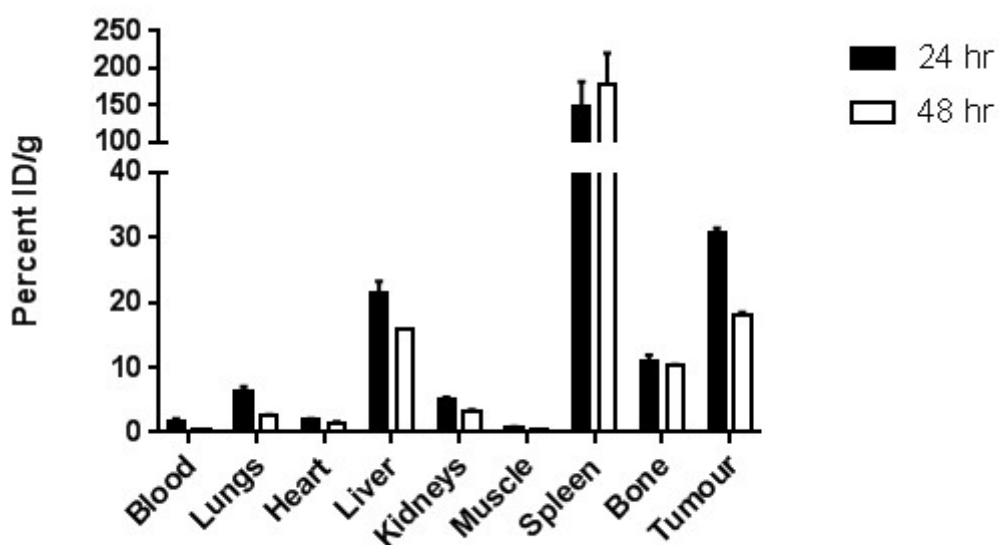

**Supplementary Figure 4.** Ex vivo biodistribution of SKOV-3 tumour-bearing NSG mice administered with [<sup>64</sup>Cu]Sar-trastuzumab at 24 or 48 hours after administration. Data shown as mean ± SEM, n=3.

|               | 24 h   |        |        |        |        | 48 h   |        |        |        |        |
|---------------|--------|--------|--------|--------|--------|--------|--------|--------|--------|--------|
| Mouse ID#     | 6      | 29     | 32     | 71     | 76     | 17     | 33     | 35     | 61     | 63     |
| <b>Blood</b>  | 22.37% | 25.55% | 17.85% | 21.15% | 22.35% | 21.26% | 17.07% | 16.18% | 13.28% | 16.02% |
| <b>Lungs</b>  | 10.11% | 9.28%  | 6.40%  | 8.86%  | 8.14%  | 10.44% | 8.97%  | 7.47%  | 6.59%  | 7.81%  |
| <b>Heart</b>  | 5.47%  | 6.43%  | 5.65%  | 5.49%  | 6.68%  | 6.94%  | 4.96%  | 5.37%  | 4.92%  | 5.49%  |
| <b>Liver</b>  | 4.67%  | 7.30%  | 6.07%  | 5.64%  | 5.78%  | 8.98%  | 8.43%  | 7.44%  | 7.38%  | 6.96%  |
| <b>Kidney</b> | 9.99%  | 9.49%  | 6.70%  | 7.98%  | 9.43%  | 8.84%  | 9.82%  | 7.52%  | 7.57%  | 8.89%  |
| <b>Muscle</b> | 1.48%  | 1.93%  | 1.31%  | 1.63%  | 1.64%  | 2.19%  | 1.42%  | 1.47%  | 1.22%  | 1.61%  |
| <b>Spleen</b> | 7.19%  | 10.42% | 7.81%  | 6.41%  | 9.37%  | 9.43%  | 7.83%  | 8.75%  | 6.43%  | 7.51%  |
| <b>Bone</b>   | 2.67%  | 3.70%  | 2.40%  | 2.62%  | 2.92%  | 2.99%  | 2.70%  | 2.52%  | 1.81%  | 2.37%  |
| <b>Tumour</b> | 47.98% | 55.94% | 44.35% | 63.76% | 50.67% | 45.83% | 78.77% | 54.71% | 54.42% | 68.86% |



**Supplementary Table 3.** Ex vivo biodistribution results of SKOV-3 tumour-bearing Balb/c nu/nu mice administered with [<sup>64</sup>Cu]Sar-trastuzumab. All values are expressed as % IA/g.

|           | <b>48 h</b> |        |        |        |        |
|-----------|-------------|--------|--------|--------|--------|
| Mouse ID# | 28          | 34     | 45     | 54     | 82     |
| Blood     | 17.63%      | 18.73% | 22.34% | 18.65% | 19.74% |
| Lungs     | 9.40%       | 6.86%  | 9.71%  | 8.24%  | 11.62% |
| Heart     | 7.26%       | 5.69%  | 5.98%  | 5.97%  | 6.04%  |
| Liver     | 7.04%       | 5.30%  | 5.93%  | 6.00%  | 6.41%  |
| Kidney    | 8.92%       | 8.05%  | 8.06%  | 7.22%  | 9.12%  |
| Muscle    | 1.46%       | 1.58%  | 1.93%  | 1.94%  | 1.60%  |
| Spleen    | 7.81%       | 8.42%  | 10.25% | 7.32%  | 8.53%  |
| Bone      | 1.91%       | 2.18%  | 3.02%  | 3.20%  | 3.27%  |
| Tumour    | 74.85%      | 76.42% | 46.52% | 44.32% | 55.25% |

**Supplementary Table 4.** Ex vivo biodistribution results of SKOV-3 tumour-bearing Balb/c nu/nu mice administered with [<sup>67</sup>Cu]Sar-trastuzumab. All values are expressed as % IA/g.

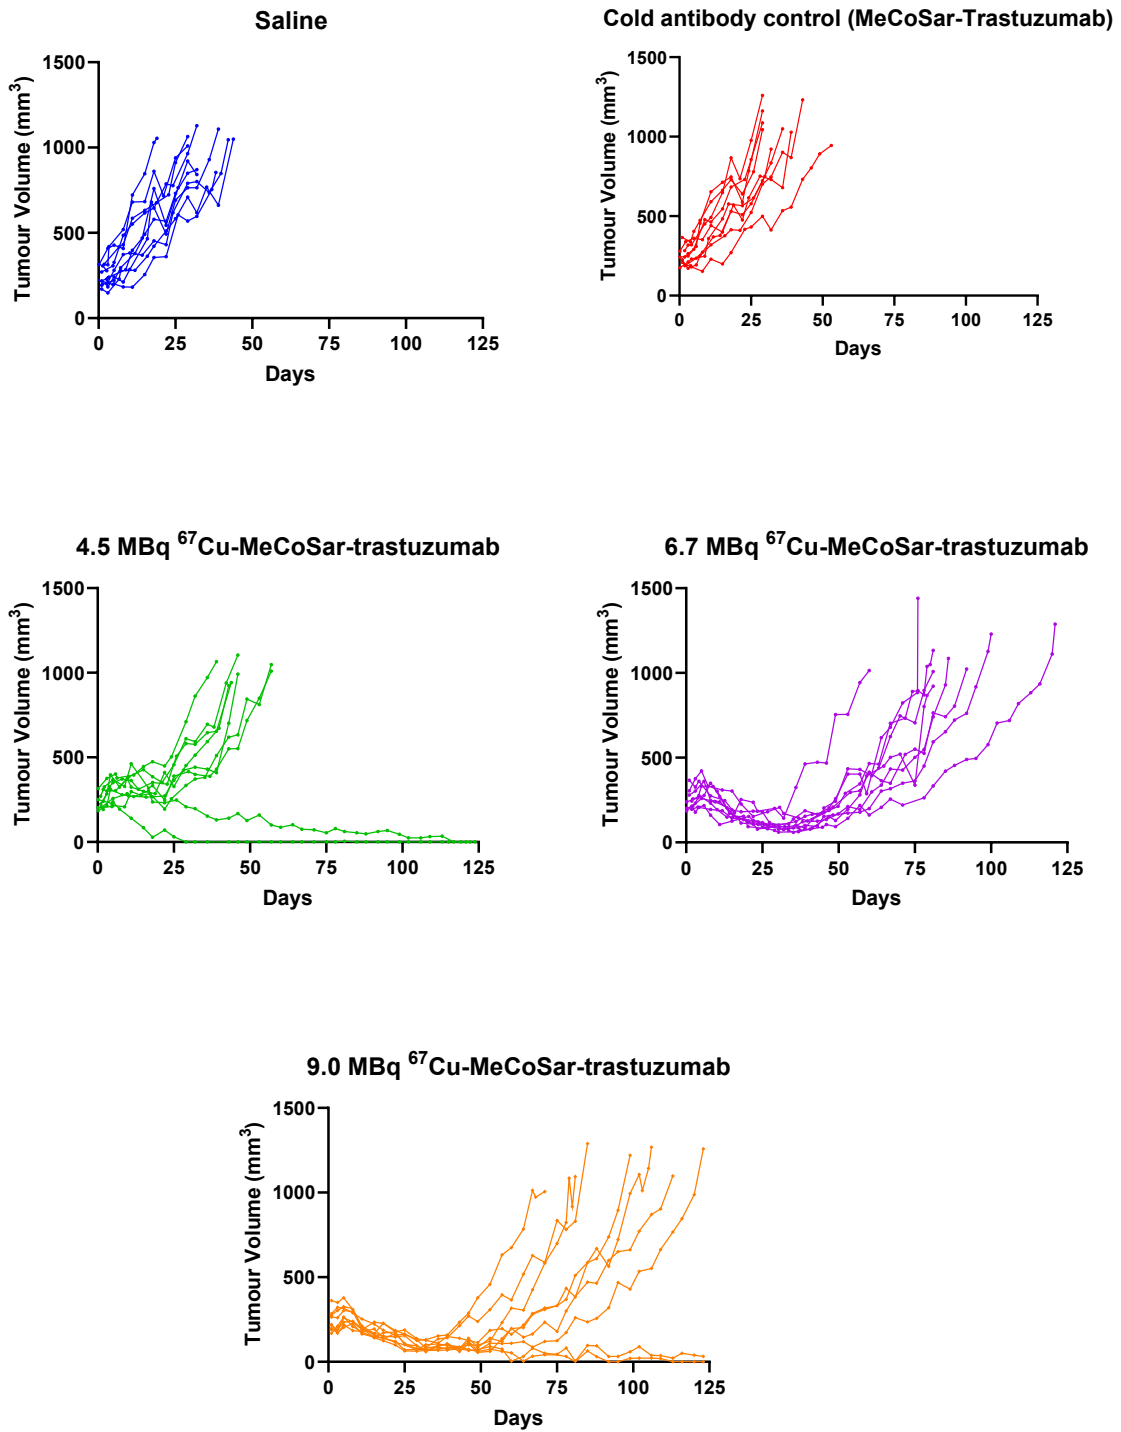

**Supplementary Figure 5.** Tumour volumes over time of individual mice per cohort following administration of either saline, cold antibody control (20 ug of unlabelled Sar-trastuzumab), or 20 ug of labelled [<sup>67</sup>Cu]Sar-trastuzumab with either 4.5, 6.7 or 9.0 MBq doses.

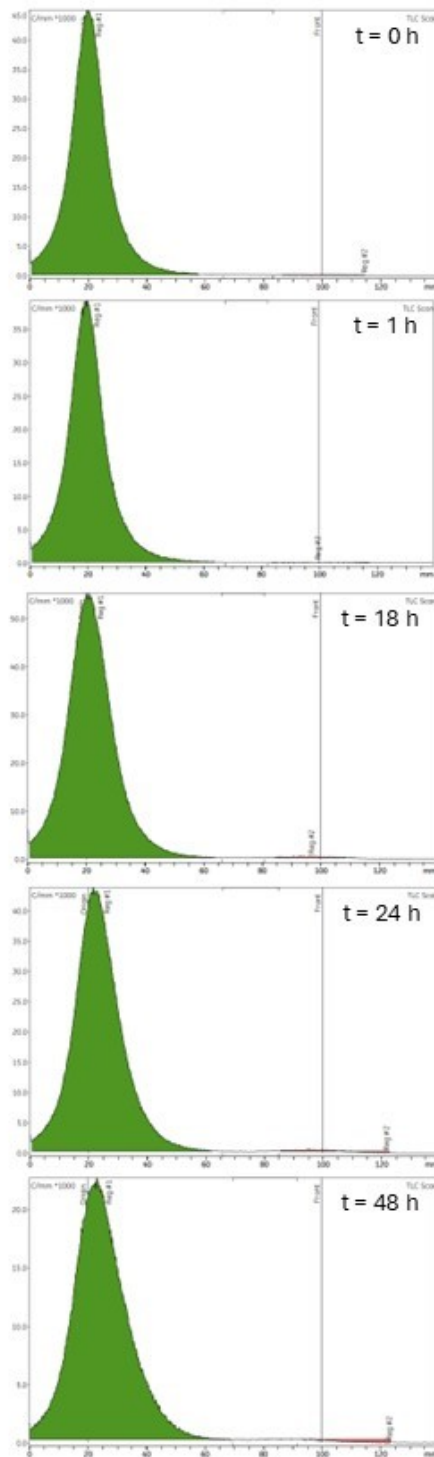

**Supplementary Figure 6.** Radio-iTLC analysis of [ $^{64}\text{Cu}$ ]CuSar-trastuzumab following incubation in human serum at 37°C for 0-48 hours.
